# Supplementary material for: Gadolinium-Based NMR Spin Relaxation Measurements of Near-Surface Electrostatic Potentials of Biomolecules
Source: PubMed Central journal article supplement (PMC11295196; doi:10.1021/jacs.4c04433), 2024-07-19
Supplement: ja4c04433_si_001.pdf [file ja4c04433_si_001.pdf]

## SUPPORTING INFORMATION

### Gadolinium-based NMR spin relaxation measurements of near-surface electrostatic potentials of biomolecules

Binhan Yu, Nicolas Bolik-Coulon, Atul K. Rangadurai, Lewis E. Kay, Junji Iwahara

#### CONTENTS

**Figure S1:** Definitions of the parameters involved in Eq. [5]

**Figure S2:** Optimization of the effective radius  $r_{pc}$  of the paramagnetic cosolutes

**Figure S3:** Examples of spectra recorded for the biomolecules used in the current study

**Figure S4:** Comparison of  $\phi_{ENS}$  predictions with APBS and DelPhi programs

**Figure S5:** Explanation for the discrepancy between the experimental and predicted  $\phi_{ENS}$  potentials for ubiquitin L73 H<sub>N</sub>

**Figure S6:**  $\phi_{ENS}$  potentials measured for H <sub>$\alpha$</sub>  and methyl <sup>1</sup>H nuclei of ubiquitin using the Gd chelates

**Figure S7:**  $\phi_{ENS}$  potentials for RtoK CAPRIN1 measured using the positive, neutral and negative Proxyl cosolutes

**Figure S8:** Impact of 5 mM DTT on solvent PRE rates  $\Gamma_2$  and  $\phi_{ENS}$  potentials

**APBS inputs**

**DelPhi inputs**

**NMR pulse program for water <sup>1</sup>H  $R_1$  relaxation measurement**

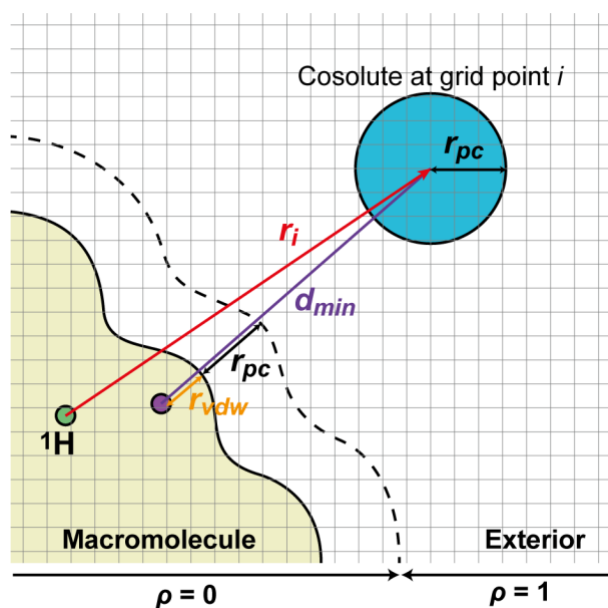

**Figure S1.** Definitions of the parameters involved in Eq. [5] in the main text. All grid points are used in the evaluation of Eq. [5] where  $\phi_i$  is the electrostatic potential at grid point  $i$  (from APBS or DelPhi output);  $r_i$  is the distance from the  $^1\text{H}$  nucleus of interest to a grid point  $i$ ; and  $\rho_i$  is a factor that represents the accessibility of grid point  $i$  and is either 1 (accessible) or 0 (inaccessible). A value of 0 was assigned to  $\rho_i$  when  $d_{min} < r_{vdw} + r_{pc}$ , where  $d_{min}$  is the distance from grid point  $i$  to the closest atom in the macromolecule;  $r_{vdw}$  is the van der Waals radius of the closest atom (the value indicated in the PQR-format file); and  $r_{pc}$  is the effective radius that defines the accessibility of the paramagnetic center. The interval for the grid space used in calculations was  $0.5 \text{ \AA}$  for each dimension. As shown in Figure S2,  $r_{pc} = 3.5 \text{ \AA}$  was obtained for the Gd chelates through empirical optimization. Coincidentally, despite the different chemical structures,  $r_{pc} = 3.5 \text{ \AA}$  was also obtained for the PROXYL derivatives in a previous study.<sup>1</sup> It should be noted that  $r_{pc}$  is an effective radius and does not represent the molecular radius unless the paramagnetic center is located at the center in a spherical molecule.

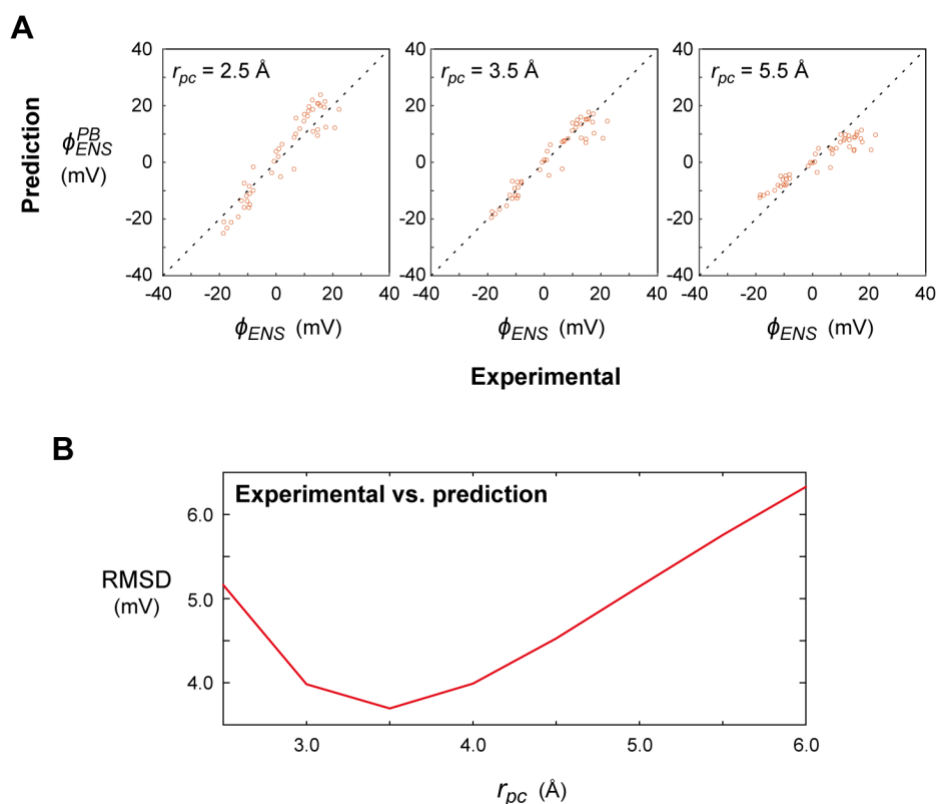

**Figure S2.** Optimization of the effective radius,  $r_{pc}$ , of the Gd-based paramagnetic cosolutes for predicting the effective near-surface electrostatic potential  $\phi_{ENS}$ . **(A)** Correlations between experimental  $\phi_{ENS}$  potentials and Poisson-Boltzmann-based predictions calculated with Eq. [5] for ubiquitin  $^1\text{H}_\text{N}$  atoms of regions with defined secondary structure. Results with  $r_{pc} = 2.5, 3.5,$  and  $5.5 \text{ \AA}$  are shown. **(B)** RMSD between the experimental  $\phi_{ENS}$  potentials and Poisson-Boltzmann-based predictions (Eq. [5]) for ubiquitin  $^1\text{H}_\text{N}$  atoms in regions of defined secondary structure. An identical value for  $r_{pc}$  was assumed for the two analogous compounds Gd-DOTA and Gd-DOTAM-BA. Since the RMSD minimum as a function of  $r_{pc}$  is shallow,  $r_{pc}$  does not have to be determined more precisely. Based on these results,  $r_{pc} = 3.5 \text{ \AA}$  was used for all calculations to predict  $\phi_{ENS}$  potentials in the current study.

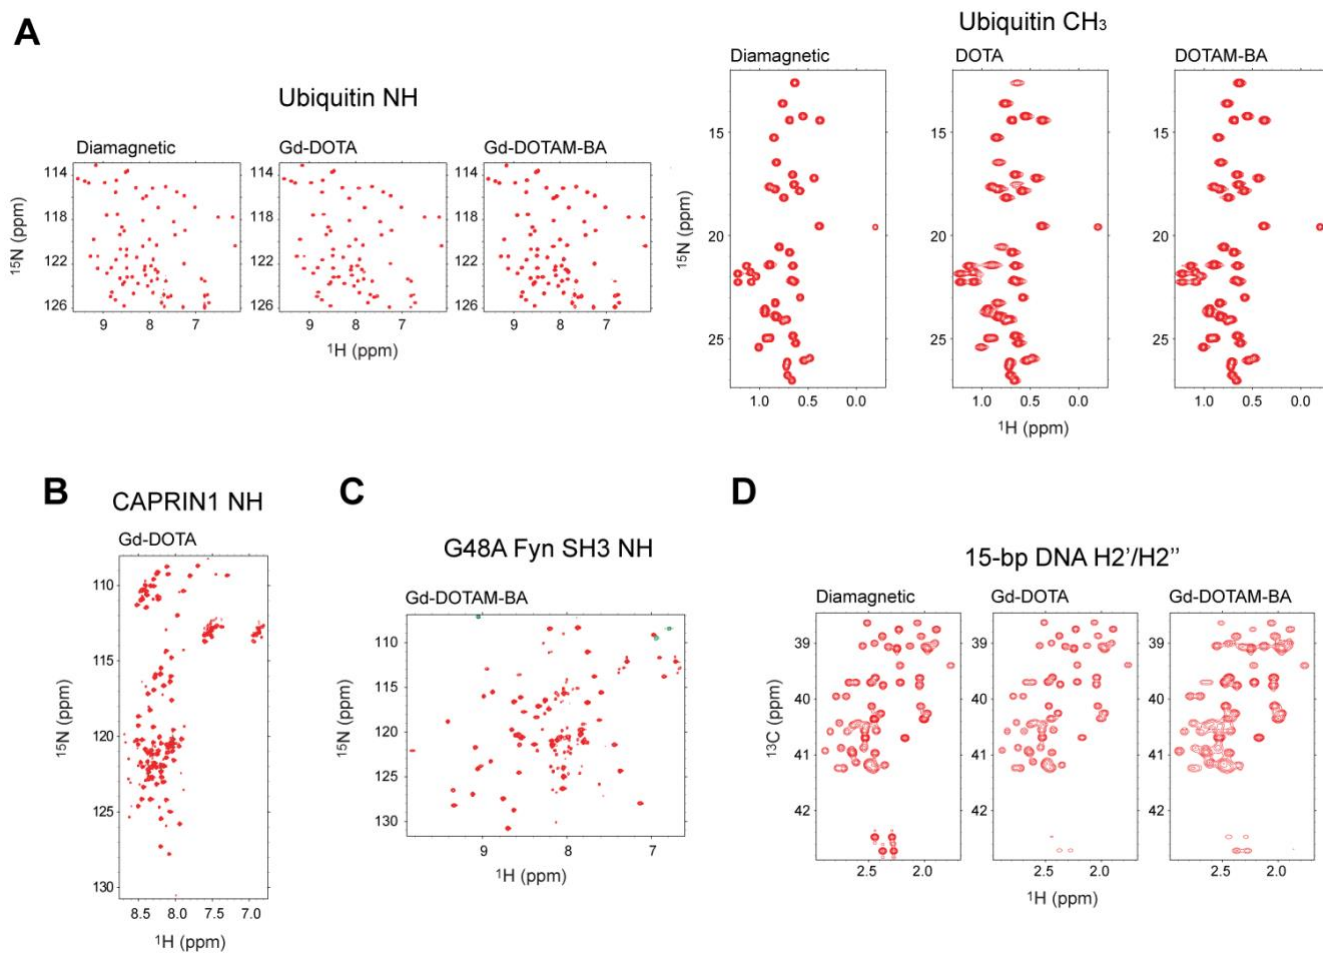

**Figure S3.** Examples of heteronuclear 2D spectra recorded to measure solvent PRE rates for ubiquitin (A), CAPRIN1 (B), G48A Fyn SH3 (C), and 15-bp DNA (D). Some signals are aliased for the  $^{15}\text{N}$  and  $^{13}\text{C}$  dimensions. The experimental conditions are indicated in the main text.

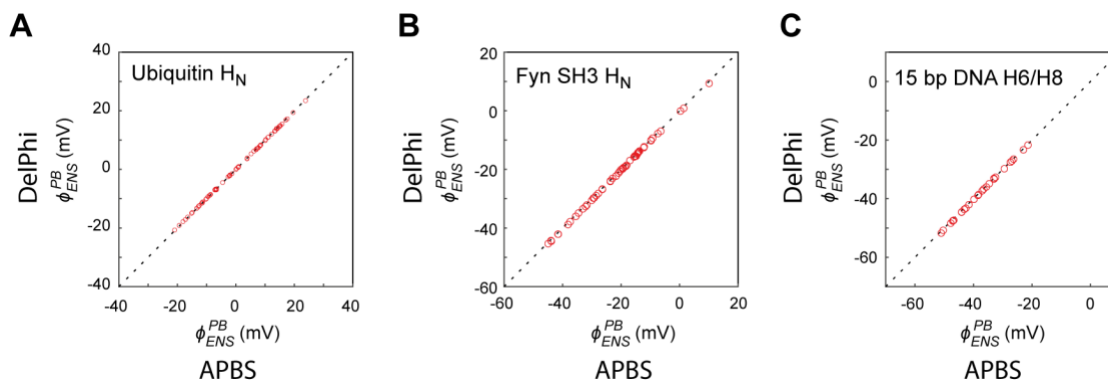

**Figure S4.** Comparison of structure-based  $\phi_{ENS}$  predictions using electrostatic potentials calculated with APBS<sup>2</sup> and DelPhi<sup>3</sup> programs. **(A)** Ubiquitin at an ionic strength of 24 mM, pH 7.5, and 25°C. **(B)** G48A Fyn SH3 domain at an ionic strength of 24 mM, pH 6.0, and 10°C. **(C)** 15-bp DNA at an ionic strength of 123 mM, pH 7.4, and 25°C. The input parameters for the nonlinear Poisson-Boltzmann based calculations with the APBS and DelPhi programs are given below in the sections “APBS Inputs” and “DelPhi Inputs”.

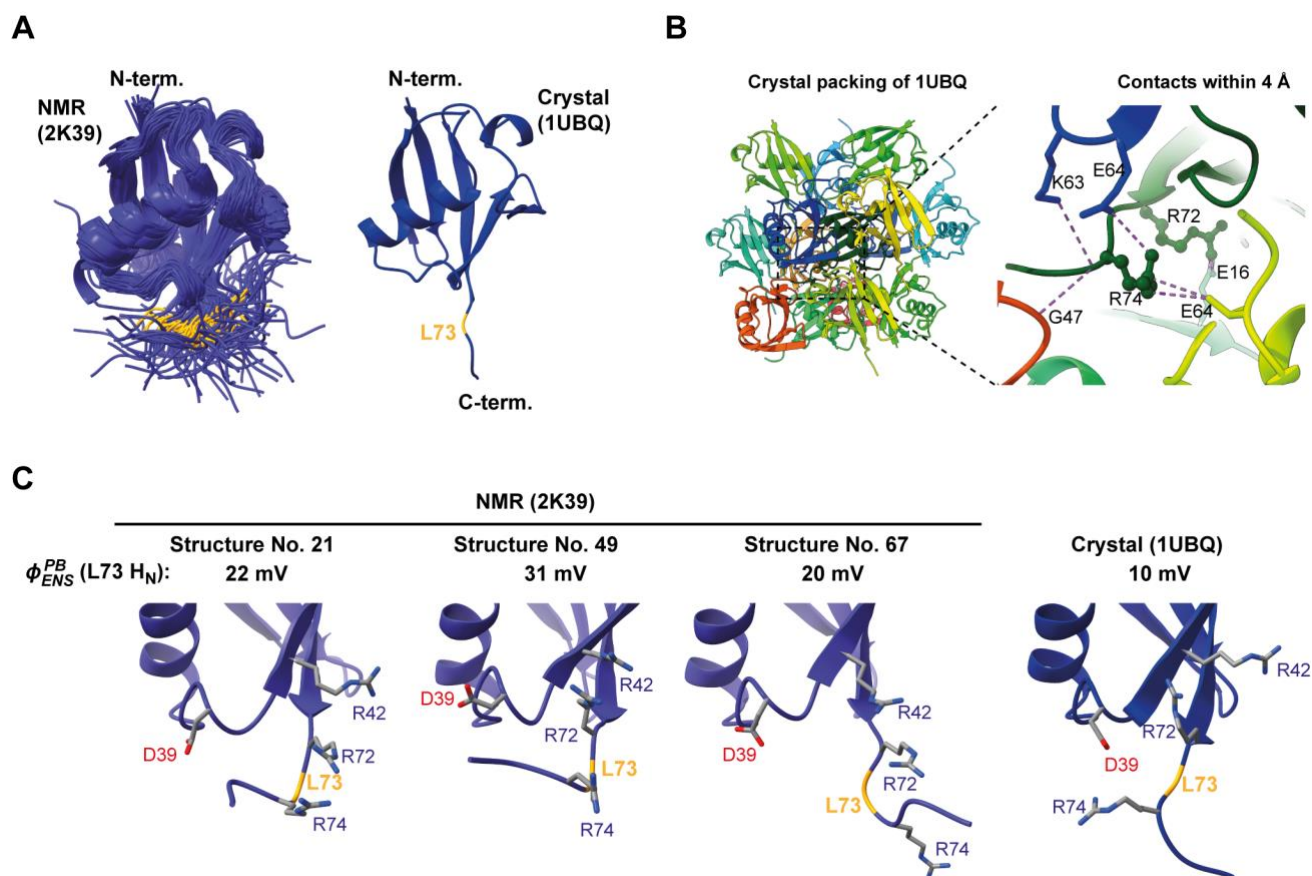

**Figure S5** Differences between the flexible C-terminal tail of ubiquitin in solution and the tail immobilized by crystal packing offer an explanation for the discrepancy between the experimental  $\phi_{ENS}$  potential for L73 H<sub>N</sub> and that predicted from the crystal structure. (A) Ribbon representations of the NMR structures (PDB 2K39)<sup>4</sup> and the crystal structure (PDB 1UBQ)<sup>5</sup>. The structural ensemble of 2K39 includes 116 structures, which are superimposed using the secondary-structure regions. The location of L73 is colored in orange. Note that in solution, the C-terminal tail is disordered, which is also evidenced by small order parameters observed for the NH groups in the C-terminal tail.<sup>4</sup> (B) Crystal packing of 1UBQ, showing that the C-terminal tail is fixed by intermolecular contacts. (C) Poisson-Boltzmann theory-based prediction of the  $\phi_{ENS}$  potential for L73 H<sub>N</sub> for some NMR structures selected from PDB 2K39 and for the crystal structure. The charged side chains whose conformations significantly influence the effective near-surface electrostatic potential (i.e., D39, R42, R72, and R73) are shown. In the crystal structure, for which the predicted  $\phi_{ENS}$  potential of L73 H<sub>N</sub> is relatively small, the negatively charged carboxylate group of D39 is pointing toward L73 H<sub>N</sub>, whereas the positively charged guanidinium groups of R42, R72, and R74 are pointing away from L73 H<sub>N</sub>.

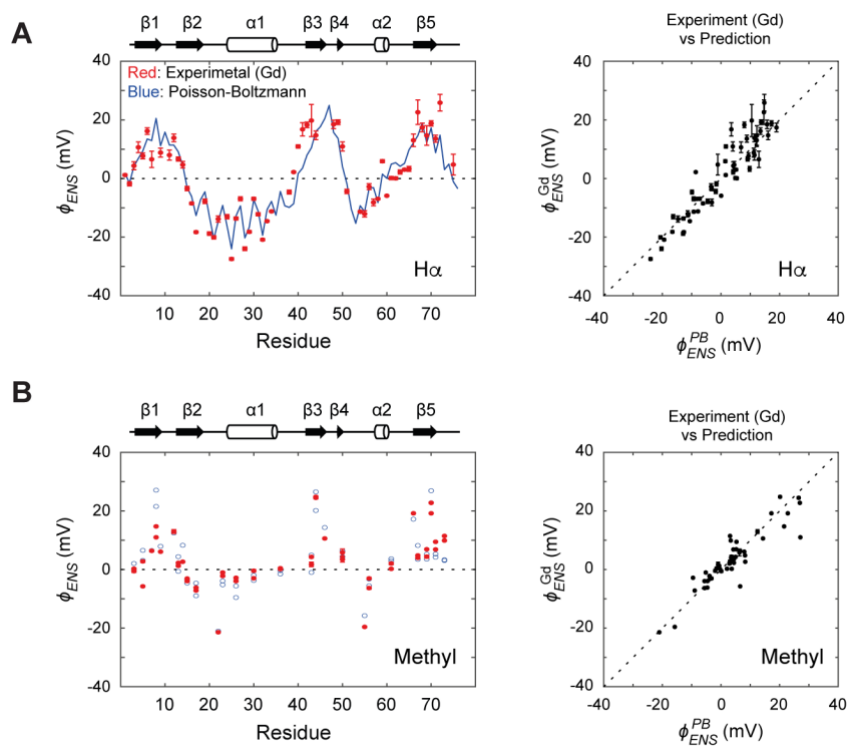

**Figure S6.** Effective near-surface electrostatic potentials  $\phi_{ENS}$  measured for H $\alpha$  and methyl  $^1\text{H}$  nuclei of ubiquitin using Gd-DOTA and Gd-DOTAM-BA cosolutes. The experimental data were compared with the predictions from the Poisson-Boltzmann electrostatic potentials. The RMSDs between the experimental values and the predictions were 4.8 mV for H $\alpha$  atoms and 3.2 mV for methyl groups in the regions of defined secondary structure.

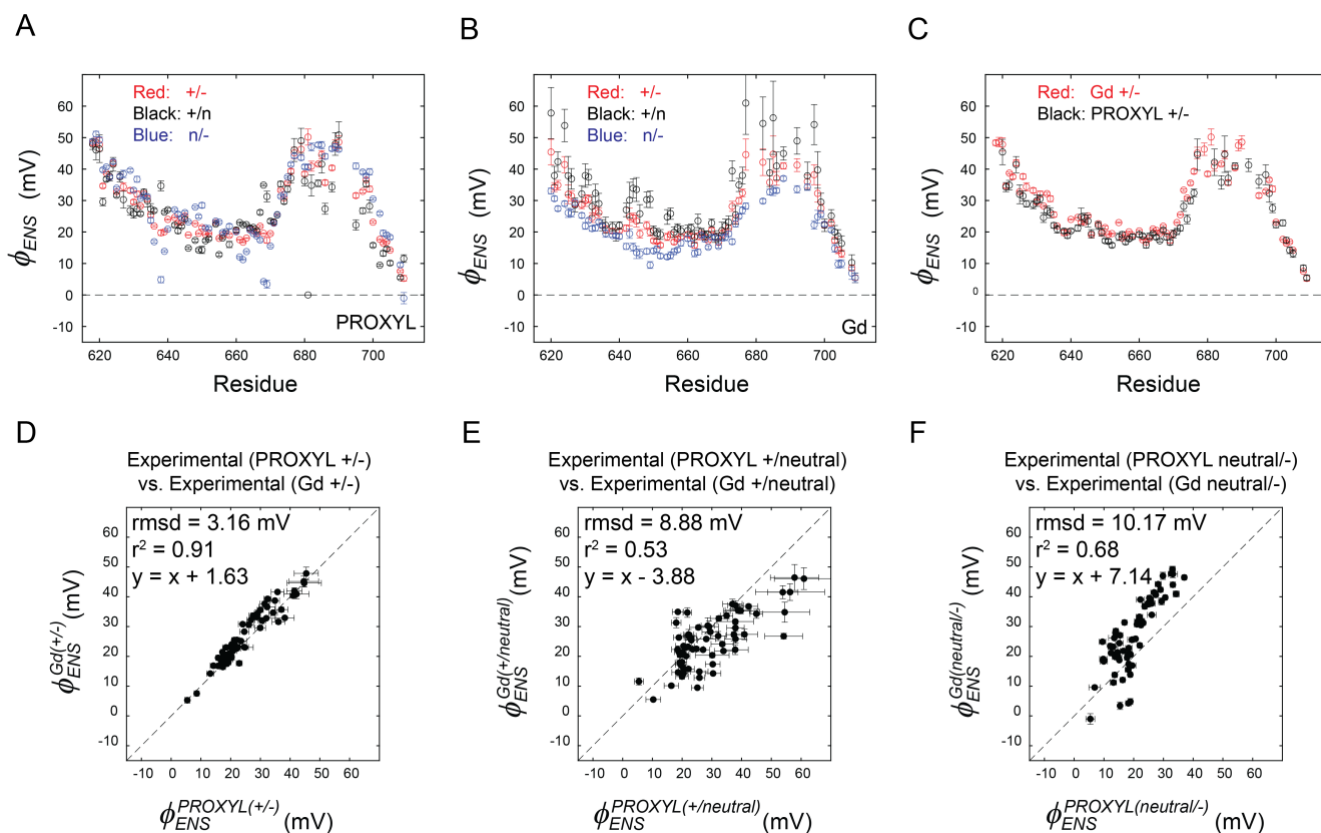

**Figure S7.**  $\phi_{ENS}$  potentials measured for  $^1\text{H}_N$  nuclei of RtoK CAPRIN1 using neutral paramagnetic cosolutes. (A) Overlaid  $\phi_{ENS}$  potentials measured using +/-, +/-neutral and neutral/- pairs of PROXYL compounds. (B) Overlaid  $\phi_{ENS}$  potentials measured using +/-, +/-neutral and neutral/- pairs of Gd-chelates. (C) Comparison of  $\phi_{ENS}$  potentials measured from +/- pairs of PROXYL and Gd cosolutes. (D) Correlation of  $\phi_{ENS}$  potentials measured using +/- pairs of PROXYL and Gd cosolutes. (E) Correlation of  $\phi_{ENS}$  potentials measured using the +/-neutral pairs of PROXYL- and Gd-based compounds. (F) As in D and E but using the neutral/- pairs of cosolutes.



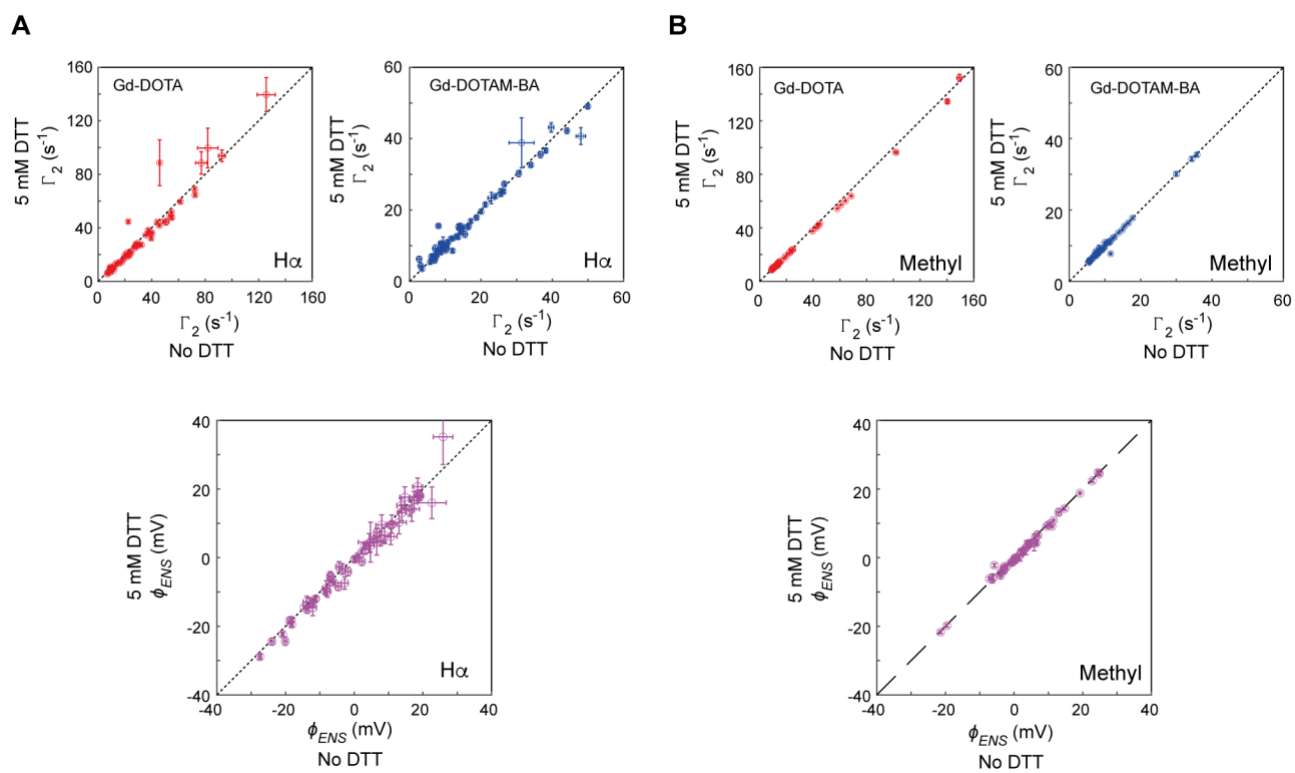

**Figure S8.** Impact of 5 mM DTT on solvent  $\Gamma_2$  PRE rates (top) and on the  $\phi_{ENS}$  potentials (bottom) measured for  $\text{H}\alpha$  (panel A) and methyl  $^1\text{H}$  nuclei (panel B) of ubiquitin using Gd-DOTA and Gd-DOTAM-BA as paramagnetic cosolutes. The solution conditions were the same as those for Figure 6.

## 1. APBS inputs

The following inputs were used for nonlinear Poisson-Boltzmann equation-based calculations with APBS<sup>2</sup>. The output files from APBS in the “dx” format were used to predict the effective near-surface potentials  $\phi_{ENS}$  using Eq. [5]. The MATLAB script package ‘PBENS’, which is available at a GitHub webpage (<https://github.com/IwaharaLab/PBENS>), was used for the calculations.

### 1a. APBS input to calculate electrostatic potentials of ubiquitin

```
read
  mol pqr lubq.pqr
end
elec
  mg-auto
  dime 257 257 257
  cglen 138 138 138
  fglen 128 128 128
  cgcent mol 1
  fgcent mol 1
  mol 1
  npbe
  bcfl sdh
  pdie 2.0000
  sdie 78.5400
  ion charge 1.000 conc 0.024 radius 2.000
  ion charge -1.000 conc 0.024 radius 2.000
  srfm smol
  chgm spl2
  sdens 10.00
  sradi 1.40
  swin 0.30
  temp 298.15
  calcenergy total
  calcforce no
  write pot dx lubq_ic24mM_pot2.0
end
print elecEnergy 1 end
quit
```

The PQR file, lubq.pqr, was generated from the PDB file lubq using the PDB2PQR program<sup>6</sup> along with PROPKA<sup>7</sup>-based selection of titration states at pH 7.5 and the AMBER force field parameters. The ion concentrations (0.024 M) and the temperature (298.15 K) were set based on the experimental conditions. The 3D space is 128 Å × 128 Å × 128 Å with an interval of 0.5 Å (257 points along each dimension). The dielectric constants were set to 2.0 for the interior of the protein and to 78.54 for the solvent.

## 1b. APBS input to calculate electrostatic potentials of G48A Fyn SH3

```
read
  mol pqr 3cqt_mutate2.pqr
end
elec
  mg-auto
  dime 257 257 257
  cglen 138 138 138
  fglen 128 128 128
  cgcent mol 1
  fgcent mol 1
  mol 1
  npbe
  bcfl sdh
  pdie 2.0000
  sdie 78.5400
  ion charge 1.000 conc 0.024 radius 2.000
  ion charge -1.000 conc 0.024 radius 2.000
  srfm smol
  chgm spl2
  sdens 10.00
  sradi 1.40
  swin 0.30
  temp 283.15
  calcenergy total
  calcforce no
  write pot dx 3cqt_mutate2_ic24mM_pot2.0
end
print elecEnergy 1 end
quit
```

The PQR file, 3cqt\_mutate2.pqr, was generated from a PDB-format file using the PDB2PQR program<sup>6</sup> along with PROPKA<sup>7</sup>-based selection of titration states at pH 6.0 and the AMBER force field parameters. The ion concentrations (0.024 M) and the temperature (283.15 K) were set based on the experimental conditions. The 3D space is 128 Å × 128 Å × 128 Å with an interval of 0.5 Å (257 points along each dimension). The dielectric constants were set to 2.0 for the interior of the protein and to 78.54 for the solvent.

### 1c. APBS input to calculate electrostatic potentials of the 15-bp DNA

```
read
  mol pqr eg15.pqr
end
elec
  mg-auto
  dime 321 321 321
  cglen 180 180 180
  fglen 160 160 160
  cgcent mol 1
  fgcent mol 1
  mol 1
  npbe
  bcfl sdh
  pdie 2.0000
  sdie 78.5400
  ion charge 1.000 conc 0.123 radius 2.000
  ion charge -1.000 conc 0.123 radius 2.000
  srfm smol
  chgm spl2
  sdens 10.00
  sradi 1.40
  swin 0.30
  temp 298.15
  calcenergy total
  calcforce no
  write pot dx eg15_pot2.0
end
print elecEnergy 1 end
quit
```

The PQR file, eg15.pqr, was generated from a PDB-format file using the PDB2PQR program<sup>6</sup> along with PROPKA<sup>7</sup>-based selection of titration states at pH 7.4 and the AMBER force field parameters. The ion concentrations (0.123 M) and the temperature (298.15 K) were set based on the experimental conditions. The 3D space is 160 Å × 160 Å × 160 Å with an interval of 0.5 Å (321 points along each dimension). The dielectric constants were set to 2.0 for the interior of DNA and to 78.54 for the solvent.

## 2. Delphi inputs

The following inputs were used for nonlinear Poisson-Boltzmann equation-based calculations with DelPhi<sup>3</sup>. The output files from DelPhi in the “cube” format were used to predict the effective near-surface potentials  $\phi_{ENS}$  using Eq. [5]. The MATLAB script package ‘PBENS’ was used for the calculations.

### 2a. DelPhi input to calculate electrostatic potentials of ubiquitin

```
gsize=257
scale=2.0
temperature=25
out(phi,file=lubq_ic24mM_pot_2.0.cube,format=cube)
in(modpdb4,file="lubq_forDelphi.pqr",format=pqr)
Center(unit=15)
indi=2.0
exdi=78.54
prbrad=1.4
salt=0.024
ionrad=2.0
bndcon=2
maxc=0.0001
nonit=100
energy(s,c,g)
```

The ion concentrations (0.024 M) and the temperature (25°C) were set based on the experimental conditions. The 3D space is 128 Å × 128 Å × 128 Å with an interval of 0.5 Å (257 points along each dimension). The dielectric constants were set to 2.0 for the interior of the protein and to 78.54 for the solvent.

## 2b. DelPhi input to calculate electrostatic potentials of G48A Fyn SH3

```
gsize=257
scale=2.0
temperature=10
out(phi,file=3cqt_mutate2_ic24mM_pot_2.0.cube,format=cube)
in(modpdb4,file="3cqt_mutate2_forDelphi.pqr",format=pqr)
Center(unit=15)
indi=2.0
exdi=78.54
prbrad=1.4
salt=0.024
ionrad=2.0
bndcon=2
maxc=0.0001
nonit=100
energy(s,c,g)
```

The ion concentrations (0.024 M) and the temperature (10°C) were set based on the experimental conditions. The 3D space is 128 Å × 128 Å × 128 Å with an interval of 0.5 Å (257 points along each dimension). The dielectric constants were set to 2.0 for the interior of the protein and to 78.54 for the solvent.

## 2c. DelPhi input to calculate electrostatic potentials of the 15-bp DNA

```
gsize=321
scale=2.0
temperature=25
out(phi,file=eg15_pot_2.0.cube,format=cube)
in(modpdb4,file="eg15_forDelphi.pqr",format=pqr)
Center(unit=15)
indi=2.0
exdi=78.54
prbrad=1.4
salt=0.123
ionrad=2.0
bndcon=2
maxc=0.0001
nonit=100
energy(s,c,g)
```

The ion concentrations (0.123 M) and the temperature (25°C) were set based on the experimental conditions. The 3D space is 160 Å × 160 Å × 160 Å with an interval of 0.5 Å (321 points along each dimension). The dielectric constants were set to 2.0 for the interior of DNA and to 78.54 for the solvent.

### 3. NMR pulse program for water $^1\text{H}$ $R_1$ measurement

Measurement of water  $^1\text{H}$   $R_1$  relaxation with a high-field NMR instrument is generally nontrivial due to radiation damping. Although probe detuning has been used to suppress radiation damping in a trade-off against signal-to-noise,<sup>8</sup> the extent of detuning required for accurate measurement may not be obvious to researchers. The following pulse program for Bruker NMR spectrometers was designed to measure water  $^1\text{H}$   $R_1$  relaxation rates without the requirement of detuning. This pulse program was used to obtain the water relaxivity data shown in Figure 3B. Note that the net longitudinal relaxation time is  $\text{time\_relax} + 2u + \text{p55} + \text{d16} + 4u$ .

---

```
/* 1HT1_water_lek_500_cp

Used to record 1H T1 of water as a series of 1Ds

Written by LEK May 22, 2016

Magnetization originates as zero and measure build up (1- exp(-T/T1) profile

Modified for cryo probe

*/

#include <Avance.incl>
#include <Grad.incl>
#include <Delay.incl>

;Define phases
#define zero ph=0.0
#define one ph=90.0
#define two ph=180.0
#define three ph=270.0

;Define Pulses
define pulse pwh                ; 1H hard pulse at power pl1
    "pwh=p1"

define pulse pwh_theta
    "pwh_theta=p12"            ; small tip angle pulse

;Define delays

"in0=infl/2"
"d11=30m"

define delay dly_lk
    "dly_lk = d17"

define list<delay> time_relax = <$VDLIST>

"cnst12 = plw12" ; power level for 1H scrambling pulse

"l2 = 0" ; pointer to vd list for magnetization T1 recovery

1 ze
```



```

; check validity of parameters

if "cnst12 > 4.0"
{
  2u
  print "error: power level for 1H locking is too large < 4W"
  goto HaltAcqu
}

if "dly_lk > 41m" {
  2u
  print "error: ly_lk too lone < 40 ms"
  goto HaltAcqu
}

2 d11 do:f2

; continue to check run time variables

"DELTA = time_relax[12]"

if "DELTA > 20s" {
  2u
  print "error: time_relax is too long < 20s"
  goto HaltAcqu
}

2u p11:f1          ; power(tpwr)
d1                ; delay(d1)

20u UNBLKGRAD      ; dly 20u, unblank gradients and lock hold

; dephase initial proton magnetization

2u p112:f1
(2u cw zero):f1
dly_lk            ; turn on cw decoupling for a delay of dly_lk
2u do:f1

2u p112:f1
(2u cw one):f1
"DELTA = dly_lk/2.0"
DELTA            ; turn on cw decoupling for a delay of dly_lk
2u do:f1

2u
p55:gp5*0.5      ; gradient 5 * 0.5
d16

2u p11:f1
(pwh zero):f1

2u
p55:gp5          ; gradient 5
d16

(pwh one):f1

```

```

2u
p55:gp5*0.3      ; gradient 5
d16

4u BLKGRAD

"DELTA = time_relax[l2]"
  DELTA

(pwh_theta ph1):f1

go=2 ph31      ; acquire fid
d11 mc #0 to 2 F0(zd)  ; write FID to disk
F1QF(calclc(l2,1))

HaltAcqu, 1m
exit

ph1=0 1 2 3
ph31=0 1 2 3
ph26=0
ph27=1
ph28=2
ph29=3

;d1 : repetition delay
;d11 : delay for disk i/o, 30ms
;d16 : gradient recovery delay, 200us
;d17 : delay for 1H scrambling - set to 40 ms
;p11 : tpwr - power level for pwh
;p112 : power level for 1H scrambling , typically about 23dB less power than high power
;cnst12 : power in
;p1 : pwh
;p12 : pwh_theta , small tip angle pulse
;zgoptns :

```

## References for Supporting Information

- (1) Yu, B.; Pletka, C. C.; Pettitt, B. M.; Iwahara, J. De novo determination of near-surface electrostatic potentials by NMR. *Proc Natl Acad Sci U S A* **2021**, *118*, e2104020118.
- (2) Jurrus, E.; Engel, D.; Star, K.; Monson, K.; Brandi, J.; Felberg, L. E.; Brookes, D. H.; Wilson, L.; Chen, J.; Liles, K. *et al.* Improvements to the APBS biomolecular solvation software suite. *Protein Sci* **2018**, *27*, 112.
- (3) Li, C.; Jia, Z.; Chakravorty, A.; Pahari, S.; Peng, Y.; Basu, S.; Koirala, M.; Panday, S. K.; Petukh, M.; Li, L. *et al.* DelPhi Suite: New Developments and Review of Functionalities. *J Comput Chem* **2019**, *40*, 2502.
- (4) Lange, O. F.; Lakomek, N.-A.; Farès, C.; Schröder, G. F.; Walter, K. F. A.; Becker, S.; Meiler, J.; Grubmüller, H.; Griesinger, C.; de Groot, B. L. Recognition Dynamics Up to Microseconds Revealed from an RDC-Derived Ubiquitin Ensemble in Solution. *Science* **2008**, *320*, 1471.
- (5) Vijay-Kumar, S.; Bugg, C. E.; Cook, W. J. Structure of ubiquitin refined at 1.8 Å resolution. *J Mol Biol* **1987**, *194*, 531.
- (6) Dolinsky, T. J.; Czodrowski, P.; Li, H.; Nielsen, J. E.; Jensen, J. H.; Klebe, G.; Baker, N. A. PDB2PQR: expanding and upgrading automated preparation of biomolecular structures for molecular simulations. *Nucleic Acids Res* **2007**, *35*, W522.
- (7) Olsson, M. H.; Sondergaard, C. R.; Rostkowski, M.; Jensen, J. H. PROPKA3: consistent treatment of internal and surface residues in empirical  $pK_a$  predictions. *J Chem Theory Comput* **2011**, *7*, 525.
- (8) Krishnan, V. V.; Murali, N. Radiation damping in modern NMR experiments: Progress and challenges. *Prog Nucl Magn Reson Spectrosc* **2013**, *68*, 41.
